# Supplementary material for: Cardiac conduction disturbances in patients with ankylosing spondylitis: results from a 5-year follow-up cohort study
Source: PubMed Central journal article supplement — RMD Open. 2019 Nov 13;5(2):e001053. doi: 10.1136/rmdopen-2019-001053 (PMC6861087; doi:10.1136/rmdopen-2019-001053), 2019-11-13
Supplement: rmdopen-2019-001053supp001.pdf [file rmdopen-2019-001053supp001.pdf]

**Supplementary Table 1.** Baseline characteristics of patients with and without a cardiac conduction disturbance (CCD) at five-year follow-up, stratified by the median age at baseline (49 years).

|                                                        | Patients ≤49 years at baseline |                       | Patients ≥50 years at baseline |                       |
|--------------------------------------------------------|--------------------------------|-----------------------|--------------------------------|-----------------------|
|                                                        | CCD<br>(n=5)                   | Without CCD<br>(n=85) | CCD<br>(n=18)                  | Without CCD<br>(n=64) |
| <b>General characteristics</b>                         |                                |                       |                                |                       |
| Male sex                                               | 4 (80.0)                       | 46 (54.1)             | 15 (83.3)                      | 28 (43.8)             |
| Age, years                                             | 44 (34, 46)                    | 41 (33, 46)           | 65 (60, 66)                    | 61 (54, 64)           |
| Current or past smoking                                | 2 (40.0)                       | 33 (38.8)             | 13 (72.2)                      | 35 (54.7)             |
| Waist circumference, cm (n=170)                        | 100 (76, 119)                  | 83 (76, 92)           | 103 (98, 109)                  | 90 (83, 98)           |
| BMI, kg/m <sup>2</sup>                                 | 28.7 (21.8, 34.3)              | 24.0 (22.6, 26.0)     | 28.1 (25.5, 29.8)              | 25.9 (22.8, 28.8)     |
| BMI ≥ 25 kg/m <sup>2</sup>                             | 3 (60.0)                       | 31 (36.5)             | 15 (83.3)                      | 37 (57.8)             |
| <b>AS characteristics</b>                              |                                |                       |                                |                       |
| Symptom duration, years (n=170)                        | 14 (11, 28)                    | 14 (10, 22)           | 40 (35, 46)                    | 32 (24, 38)           |
| HLA-B27 positive                                       | 5 (100.0)                      | 77 (90.6)             | 17 (94.4)                      | 50 (78.1)             |
| History of peripheral arthritis                        | 3 (60.0)                       | 41 (48.2)             | 14 (77.8)                      | 42 (65.6)             |
| History of anterior uveitis                            | 4 (80.0)                       | 34 (40.0)             | 15 (83.3)                      | 35 (54.7)             |
| At least one syndesmophyte                             | 2 (40.0)                       | 26 (30.6)             | 15 (83.3)                      | 37 (57.8)             |
| mSASSS, score                                          | 2 (1, 5)                       | 2 (0, 8)              | 23 (6, 67)                     | 13 (1, 31)            |
| Tender joint count (max 68)                            | 0 (0, 0)                       | 0 (0, 0)              | 0 (0, 2)                       | 0 (0, 1)              |
| Swollen joint count (max 66)                           | 0 (0, 0)                       | 0 (0, 0)              | 0 (0, 0)                       | 0 (0, 0)              |
| ASDAS-CRP, score                                       | 1.8 (1.5, 2.6)                 | 2.0 (1.4, 2.8)        | 3.0 (2.1, 3.5)                 | 1.8 (1.3, 2.6)        |
| ASDAS-CRP ≥2.1, n (%)                                  | 1 (20.0)                       | 41 (48.2)             | 14 (77.8)                      | 26 (40.6)             |
| BASDAI, score (n=170)                                  | 2.7 (1.5, 4.4)                 | 3.3 (1.3, 5.5)        | 4.6 (1.8, 6.8)                 | 2.7 (1.8, 4.8)        |
| BASMI, score                                           | 1.6 (1.2, 2.7)                 | 2.4 (1.4, 3.0)        | 4.3 (3.5, 7.1)                 | 3.6 (2.6, 4.2)        |
| BASFI, score (n=170)                                   | 1.3 (0.8, 3.0)                 | 1.4 (0.5, 3.2)        | 4.4 (2.8, 5.8)                 | 2.3 (1.5, 4.6)        |
| ESR, mm/h                                              | 5 (4, 15)                      | 10 (6, 18)            | 12 (7, 28)                     | 13 (10, 18)           |
| CRP, mg/L                                              | 0.5 (0.5, 6)                   | 2 (1, 6.5)            | 5.5 (2, 14)                    | 2 (1, 5)              |
| <b>Cardiovascular characteristics</b>                  |                                |                       |                                |                       |
| CCD (at baseline)                                      | 4 (80.0)                       | 3 (3.5)               | 11 (61.1)                      | 5 (7.8)               |
| Aortic regurgitation <sup>a</sup>                      | 1 (20.0)                       | 6 (7.1)               | 5 (27.8)                       | 14 (21.9)             |
| Aortic regurgitation <sup>a</sup> , moderate or severe | 0 (0.0)                        | 0 (0.0)               | 3 (16.7)                       | 5 (7.8)               |
| Ischemic heart disease                                 | 0 (0.0)                        | 0 (0.0)               | 3 (16.7)                       | 3 (4.7)               |
| Systolic blood pressure, mmHg                          | 145 (128, 160)                 | 120 (116, 130)        | 145 (135, 163)                 | 140 (130, 159)        |
| Diastolic blood pressure, mmHg                         | 85 (78, 93)                    | 75 (70, 80)           | 78 (65, 80)                    | 80 (71, 85)           |
| <b>Reported comorbidity</b>                            |                                |                       |                                |                       |
| Hypertension                                           | 2 (40.0)                       | 7 (8.2)               | 9 (50.0)                       | 29 (45.3)             |
| Diabetes                                               | 0 (0.0)                        | 0 (0.0)               | 0 (0.0)                        | 5 (7.8)               |
| Hyperlipidemia                                         | 0 (0.0)                        | 2 (2.4)               | 4 (22.2)                       | 5 (7.8)               |
| <b>Medications</b>                                     |                                |                       |                                |                       |
| Anti-platelets or anti-coagulants                      | 0 (0.0)                        | 0 (0.0)               | 8 (44.4)                       | 6 (9.4)               |
| - Anti-platelets                                       | 0 (0.0)                        | 0 (0.0)               | 7 (38.9)                       | 5 (7.8)               |
| - Anti-coagulants                                      | 0 (0.0)                        | 0 (0.0)               | 1 (5.6)                        | 1 (1.6)               |
| Anti-hypertensives                                     | 1 (20.0)                       | 3 (3.5)               | 11 (61.1)                      | 22 (34.4)             |
| - ACE inhibitors/ARBs                                  | 1 (20.0)                       | 2 (2.4)               | 6 (33.3)                       | 11 (17.2)             |
| - Beta-blockers                                        | 1 (20.0)                       | 0 (0.0)               | 8 (44.4)                       | 12 (18.8)             |
| Lipid modulators                                       | 0 (0.0)                        | 0 (0.0)               | 3 (16.7)                       | 7 (10.9)              |
| DMARDs                                                 | 1 (20.0)                       | 30 (35.3)             | 4 (22.2)                       | 25 (39.1)             |
| - TNF inhibitors                                       | 1 (20.0)                       | 18 (21.2)             | 1 (5.6)                        | 14 (21.9)             |
| - csDMARDs                                             | 1 (20.0)                       | 27 (31.8)             | 4 (22.2)                       | 21 (32.8)             |
| NSAIDs                                                 | 4 (80.0)                       | 71 (83.5)             | 14 (77.8)                      | 45 (70.3)             |
| Prednisolone                                           | 0 (0.0)                        | 0 (0.0)               | 2 (11.1)                       | 4 (6.3)               |

Data are expressed as number (%) or median (Q1, Q3) and presented for 172 patients if not stated otherwise.

<sup>a</sup> Missing data in 13 patients who did not undergo echocardiography.

CCD, cardiac conduction disturbance. BMI, body mass index. mSASSS, modified Stoke Ankylosing Spondylitis Spinal Score. ASDAS-CRP, AS disease activity score-C reactive protein. BASDAI, Bath AS disease activity index. BASMI, Bath AS metrology index. BASFI, Bath AS functional index. CRP, C reactive protein. ACE, angiotensin-converting enzyme. ARBs, angiotensin II receptor blockers. DMARDs, disease-modifying anti-

rheumatic drugs. csDMARDs, conventional synthetic DMARDs, NSAIDs, nonsteroidal anti-inflammatory drugs.

**Supplementary Table 2.** ECG characteristics at baseline and five-year follow-up in patients with AS, stratified by the median age.

|                                | Patients ≤ 49 years (n=90) |                |             |         | Patients ≥ 50 years (n=82) |                |            |         |
|--------------------------------|----------------------------|----------------|-------------|---------|----------------------------|----------------|------------|---------|
|                                | Baseline                   | Follow-up      | Change      | p-value | Baseline                   | Follow-up      | Change     | p-value |
| <b>ECG measurements</b>        |                            |                |             |         |                            |                |            |         |
| Heart rate, beats/min          | 65 (58, 74)                | 64 (57, 69)    | 0 (-6, 3)   | 0.166   | 63 (57, 73)                | 69 (61, 76)    | 2 (-3, 10) | 0.021   |
| PR interval <sup>a</sup> , ms  | 160 (140, 171)             | 160 (150, 175) | 3 (-4, 10)  | 0.030   | 170 (150, 180)             | 174 (155, 193) | 4 (-4, 13) | 0.013   |
| QRS interval <sup>b</sup> , ms | 82 (80, 100)               | 88 (84, 96)    | 4 (-2, 8)   | 0.002   | 86 (80, 98)                | 86 (80, 96)    | 0 (-4, 8)  | 0.236   |
| QTcB <sup>c</sup> , ms         | 401 (385, 416)             | 402 (389, 418) | 2 (-12, 18) | 0.278   | 408 (395, 431)             | 414 (401, 425) | 6 (-9, 17) | 0.021   |
| <b>Heart rhythm, n (%)</b>     |                            |                |             |         |                            |                |            |         |
| Sinus                          | 89 (98.9)                  | 90 (100)       | n.a         | n.a     | 78 (95.1)                  | 77 (93.9)      | n.a        | n.a     |
| - Bradycardia                  | 5 (5.6)                    | 7 (7.8)        |             |         | 4 (4.9)                    | 2 (2.4)        |            |         |
| - Tachycardia                  | 1 (1.1)                    | 1 (1.1)        |             |         | 1 (1.2)                    | 1 (1.2)        |            |         |
| Atrial fibrillation            | 0                          | 0              |             |         | 2 (2.4)                    | 2 (2.4)        |            |         |
| Pacemaker rhythm               | 0                          | 0              |             |         | 1 (1.2)                    | 3 (3.7)        |            |         |
| Other                          | 1 (1.1)                    | 0              |             |         | 1 (1.2)                    | 0              |            |         |

Data are expressed as median (Q1, Q3) or number (%) and presented for 172 patients if not stated otherwise.

Comparison between ECG measurements at baseline and follow-up are calculated by related-samples Wilcoxon signed rank test.

<sup>a</sup> n=169 at start and n=167 at follow-up.

<sup>b</sup> n=171 at start, n=170 at follow-up.

<sup>c</sup> QTcB is the heart rate corrected QT interval according to Bazett; n= 171 at start, n=168 at follow-up.

**Supplementary Table 3.** Characteristics of the patients with a *developed* or *persistent* cardiac conduction disturbance (CCD) at follow-up in 2014 together with characteristics of the patients with a CCD in 2009 which had *normalized* at the follow-up ECG in 2014.

| CCD 2009-2014     | Sex | Age | Symptom duration (years) | HLA B27 | Heart Rhythm 2009                    | CCD 2009      | BB and anti-arrhythmics 2009 | Heart rhythm 2014 | CCD 2014      | BB and anti-arrhythmics 2014 |
|-------------------|-----|-----|--------------------------|---------|--------------------------------------|---------------|------------------------------|-------------------|---------------|------------------------------|
| <b>DEVELOPED</b>  |     |     |                          |         |                                      |               |                              |                   |               |                              |
|                   | M   | 66  | 41                       | 1       | SR                                   | 0             | BB                           | SR                | AVB I         | BB                           |
|                   | M   | 60  | 18                       | 1       | SR                                   | 0             | BB, amiodarone               | Sinus bradycardia | AVB Ix        | BB                           |
|                   | M   | 72  | 52                       | 1       | Sinus bradycardia                    | 0             | BB                           | PM*               | PM            | BB                           |
|                   | W   | 66  | 37                       | 1       | Alternating SR and junctional rhythm | 0             | BB                           | PM**              | PM            | BB, digoxin                  |
|                   | M   | 59  | 44                       | 1       | SR                                   | 0             |                              | SR                | AVB Ix        |                              |
|                   | M   | 55  | 35                       | 1       | SR                                   | 0             |                              | SR                | AVB Ix        |                              |
|                   | W   | 59  | 38                       | 1       | SR                                   | 0             |                              | SR                | AVB Ix        |                              |
|                   | M   | 33  | 8                        | 1       | SR                                   | 0             |                              | SR                | AVB I         |                              |
| <b>PERSISTENT</b> |     |     |                          |         |                                      |               |                              |                   |               |                              |
|                   | M   | 44  | 16                       | 1       | SR                                   | AVB Ix        | BB                           | SR                | AVB Ix        | BB                           |
|                   | M   | 66  | 11                       | 1       | SR                                   | AVB Ix        | (BB eye drops)               | SR                | AVB Ix        | (BB eye drops)               |
|                   | W   | 67  | 48                       | 0       | SR                                   | AVB Ix        | BB                           | SR                | LBBB          |                              |
|                   | M   | 62  | 37                       | 1       | SR                                   | AVB Ix        |                              | SR                | AVBI          |                              |
|                   | M   | 51  | 16                       | 1       | SR                                   | AVB Ix        |                              | SR                | AVB Ix        |                              |
|                   | M   | 69  | 42                       | 1       | SR                                   | RBBB          |                              | SR                | AVB I + RBBB  | BB                           |
|                   | M   | 76  | 52                       | 1       | PM                                   | PM            | BB                           | PM***             | PM            | BB                           |
|                   | M   | 61  | 34                       | 1       | SR                                   | AVB I         | BB                           | SR                | AVB I         |                              |
|                   | M   | 65  | 44                       | 1       | AF                                   | LAFB          | BB                           | AF                | LAFB          |                              |
|                   | M   | 64  | 36                       | 1       | SR                                   | AVB Ix + LAFB |                              | SR                | AVB Ix + LAFB |                              |
|                   | M   | 65  | 45                       | 1       | SR                                   | LAFB          |                              | SR                | LAFB          |                              |
|                   | M   | 34  | 14                       | 1       | SR                                   | AVB I         |                              | SR                | AVB Ix        |                              |
|                   | W   | 47  | 39                       | 1       | SR                                   | AVB I         |                              | SR                | AVB Ix        |                              |
|                   | M   | 44  | 14                       | 1       | SR                                   | LBBB          |                              | SR                | LBBB          |                              |
|                   | M   | 64  | 49                       | 1       | SR                                   | AVB I         |                              | SR                | AVB I         |                              |
| <b>NORMALIZED</b> |     |     |                          |         |                                      |               |                              |                   |               |                              |
|                   | W   | 64  | 44                       | 1       | SR                                   | AVB Ix        | BB                           | SR                | 0             | BB                           |
|                   | M   | 61  | 37                       | 1       | SR                                   | AVB Ix        | BB                           | SR                | 0             | BB                           |
|                   | M   | 41  | 22                       | 1       | SR                                   | AVB Ix        |                              | SR                | 0             |                              |
|                   | W   | 52  | 21                       | 1       | SR                                   | AVB Ix        |                              | SR                | 0             |                              |
|                   | M   | 48  | 13                       | 1       | SR                                   | AVB Ix        |                              | SR                | 0             |                              |
|                   | M   | 53  | 13                       | 1       | SR                                   | AVB I         |                              | SR                | 0             |                              |
|                   | M   | 31  | 8                        | 1       | SR                                   | LAFB          |                              | SR                | 0             |                              |
|                   | W   | 62  | 46                       | 1       | SR                                   | LAFB          |                              | SR                | 0             |                              |

\* The indication for pacemaker implantation was an AVB II during an acute inferior myocardial infarction which occurred four years after the baseline investigation. At baseline, the patient had a known ischemic heart disease and a mild aortic regurgitation.

\*\* The indication for pacemaker implantation was a sick sinus syndrome that developed two years after the baseline investigation. At baseline, the patient did not have a known heart disease.

\*\*\* The indication for pacemaker implantation was an AVB III several years before the baseline investigation. The patient had in parallel a severe aortic regurgitation.

CCD, cardiac conduction disturbance. BB, beta-blocker. M, man. W, woman. SR, sinus rhythm. AVB I, atrioventricular block first degree. AVB Ix, atrioventricular block first degree extra. AVB II, atrioventricular block second degree. AVB III, atrioventricular block third degree. PM, pacemaker. LBBB, left bundle branch block. RBBB, right bundle branch block. LAFB, left anterior fascicular block. AF, atrial fibrillation.
